# Supplementary material for: Iron deprivation-induced reactive oxygen species generation leads to non-autolytic PCD in Brassica napus leaves
Source: PubMed Central journal article supplement — Environ Exp Bot. 2013 Jul;91:74–83. doi: 10.1016/j.envexpbot.2013.03.006 (PMC3661939; doi:10.1016/j.envexpbot.2013.03.006), 2013-07
Supplement: mmc1.pdf [file mmc1.pdf]

## Suppl.Fig. S1

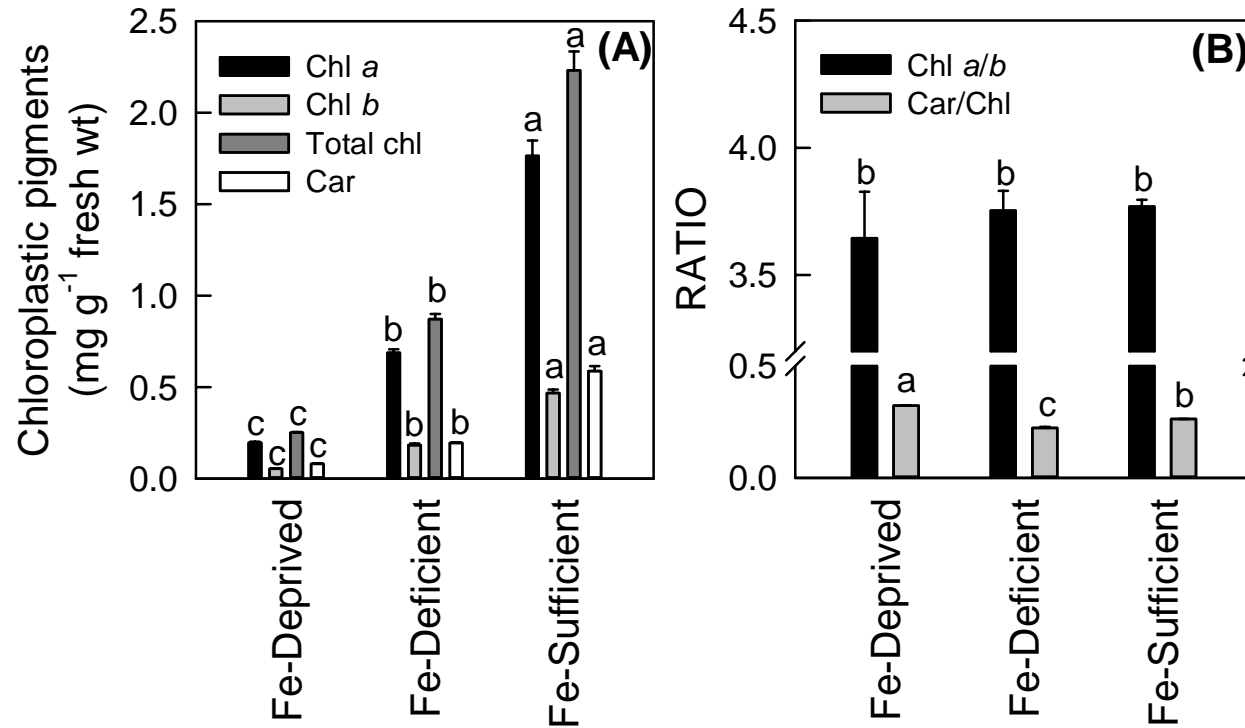

Fig. S1. Chloroplastic pigments in young *Brassica napus* leaves of Fe-deprived (0  $\mu\text{M}$  Fe), Fe-deficient (5  $\mu\text{M}$  Fe) and Fe-sufficient (50  $\mu\text{M}$  Fe) plants: (A) Chlorophyll *a*, chlorophyll *b*, total chlorophyll and carotenoid concentrations, (B) Chl *a*/Chl *b* and carotenoids/total chlorophyll ratio. Vertical bars are mean  $\pm$ SE (n=6). Bars carrying different letters are significantly different by Fisher LSD method ( $P \leq 0.05$ ).

## Suppl. Fig. S2

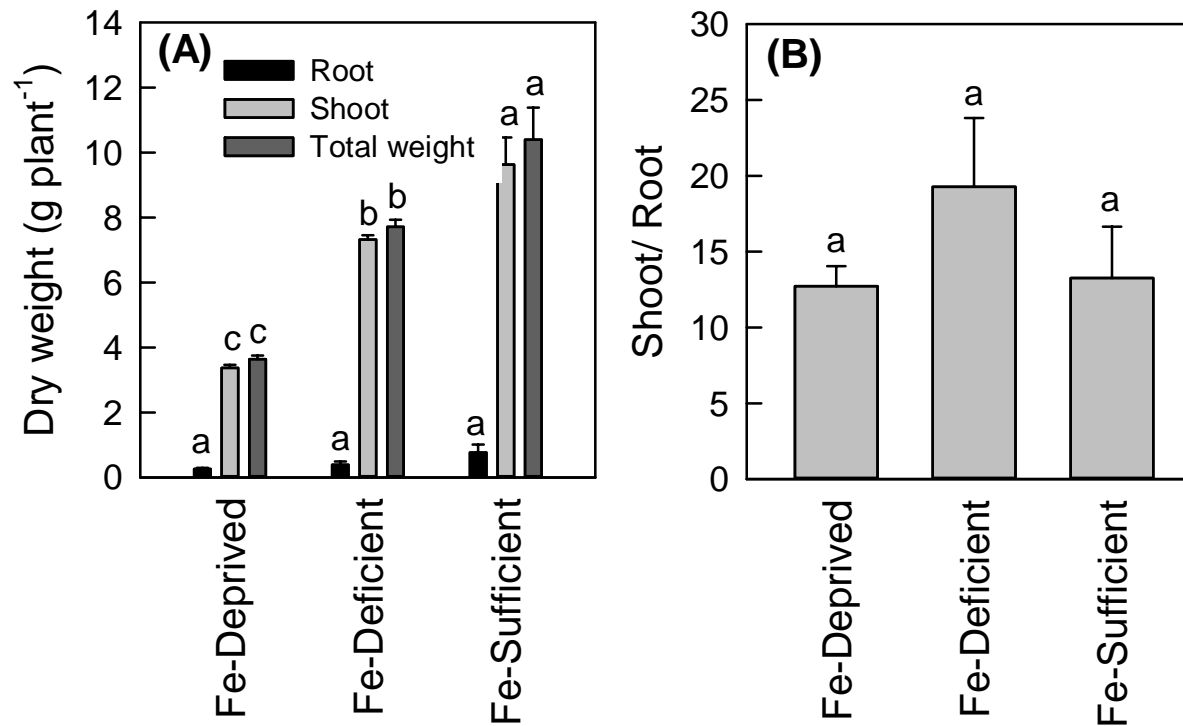

Fig. S2. Dry matter yield of Fe-deprived (0  $\mu\text{M}$  Fe), Fe-deficient (5  $\mu\text{M}$  Fe) and Fe-sufficient (50  $\mu\text{M}$  Fe) *Brassica napus* plants: (A) Roots, shoot and total dry weight, (B) shoot/root ratio. Vertical bars are mean  $\pm$ SE (n=6). Bars carrying different letters are significantly different by Fisher LSD method ( $P \leq 0.05$ ).
